# Supplementary material
Source: publisher site journal article supplement (https://www.spandidos-publications.com/7145/downloadSupplementary)
Supplement: Supplementary file 1 [file downloadSupplementary]

## Sheet: Sheet1
Table SIII. Mendelian randomization analysis results of 21 blood metabolites associated with idiopathic pulmonary causality risk.
	id.exposure.x	method	outcome.x	Metabolites	nsnp	b	se	pval	lo_ci	up_ci	or	or_lci95	or_uci95
1	M00553	Inverse variance weighted	Idiopathic pulmonary fibrosis || id:finn-b-IPF	cotinine	15	0.187706	0.0947407	0.0475624	0.00201396	0.373397	1.20648	1.00202	1.45266
2	M00553	MR Egger	Idiopathic pulmonary fibrosis || id:finn-b-IPF	cotinine	15	0.258092	0.159993	0.130713	-0.055494	0.571678	1.29446	0.946018	1.77124
3	M00553	Weighted median	Idiopathic pulmonary fibrosis || id:finn-b-IPF	cotinine	15	0.14345	0.135979	0.291453	-0.12307	0.40997	1.15425	0.884202	1.50677
4	M03127	Inverse variance weighted	Idiopathic pulmonary fibrosis || id:finn-b-IPF	hypoxanthine	21	-1.49124	0.706675	0.0348394	-2.87632	-0.106157	0.225093	0.0563415	0.899283
5	M03127	MR Egger	Idiopathic pulmonary fibrosis || id:finn-b-IPF	hypoxanthine	21	-0.691704	1.9181	0.722362	-4.45118	3.06777	0.500722	0.0116648	21.4939
6	M03127	Weighted median	Idiopathic pulmonary fibrosis || id:finn-b-IPF	hypoxanthine	21	-1.20186	1.04544	0.250301	-3.25092	0.847206	0.300635	0.0387385	2.33312
7	M22175	Inverse variance weighted	Idiopathic pulmonary fibrosis || id:finn-b-IPF	aspartylphenylalanine	5	1.46084	0.704128	0.0380167	0.0807455	2.84093	4.30956	1.08409	17.1316
8	M22175	MR Egger	Idiopathic pulmonary fibrosis || id:finn-b-IPF	aspartylphenylalanine	5	1.73539	2.02892	0.455244	-2.2413	5.71207	5.67111	0.10632	302.497
9	M22175	Weighted median	Idiopathic pulmonary fibrosis || id:finn-b-IPF	aspartylphenylalanine	5	1.5506	0.887375	0.080568	-0.188656	3.28985	4.71429	0.828071	26.8389
10	M25459	Inverse variance weighted	Idiopathic pulmonary fibrosis || id:finn-b-IPF	X-10395	29	1.27882	0.532951	0.0164169	0.234239	2.32341	3.59241	1.26395	10.2104
11	M25459	MR Egger	Idiopathic pulmonary fibrosis || id:finn-b-IPF	X-10395	29	1.07494	0.750062	0.163299	-0.395185	2.54506	2.92981	0.673556	12.744
12	M25459	Weighted median	Idiopathic pulmonary fibrosis || id:finn-b-IPF	X-10395	29	1.49966	0.760071	0.0484891	0.00992387	2.9894	4.48018	1.00997	19.8738
13	M30805	Inverse variance weighted	Idiopathic pulmonary fibrosis || id:finn-b-IPF	X-10810	16	1.22894	0.513058	0.0166057	0.223346	2.23453	3.4176	1.25025	9.34211
14	M30805	MR Egger	Idiopathic pulmonary fibrosis || id:finn-b-IPF	X-10810	16	0.8445	0.739342	0.272517	-0.60461	2.29361	2.32682	0.546288	9.91066
15	M30805	Weighted median	Idiopathic pulmonary fibrosis || id:finn-b-IPF	X-10810	16	1.15166	0.701281	0.100544	-0.222852	2.52617	3.16344	0.800234	12.5055
16	M32198	Inverse variance weighted	Idiopathic pulmonary fibrosis || id:finn-b-IPF	acetylcarnitine	18	1.75226	0.72294	0.0153591	0.3353	3.16923	5.76764	1.39836	23.789
17	M32198	MR Egger	Idiopathic pulmonary fibrosis || id:finn-b-IPF	acetylcarnitine	18	1.37725	1.89445	0.477734	-2.33587	5.09036	3.96397	0.0967265	162.448
18	M32198	Weighted median	Idiopathic pulmonary fibrosis || id:finn-b-IPF	acetylcarnitine	18	0.922452	1.05721	0.382917	-1.14968	2.99459	2.51545	0.316738	19.9771
19	M32348	Inverse variance weighted	Idiopathic pulmonary fibrosis || id:finn-b-IPF	2-aminobutyrate	40	-1.8639	0.778626	0.0166736	-3.39	-0.337789	0.155067	0.0337086	0.713346
20	M32348	MR Egger	Idiopathic pulmonary fibrosis || id:finn-b-IPF	2-aminobutyrate	40	-1.40432	2.39318	0.560807	-6.09495	3.28631	0.245533	0.00225421	26.7439
21	M32348	Weighted median	Idiopathic pulmonary fibrosis || id:finn-b-IPF	2-aminobutyrate	40	-1.48058	1.12428	0.187865	-3.68416	0.722997	0.227505	0.0251182	2.0606
22	M32504	Inverse variance weighted	Idiopathic pulmonary fibrosis || id:finn-b-IPF	docosapentaenoate (n3 DPA; 22:5n3)	10	-1.54116	0.693178	0.0261936	-2.89979	-0.182534	0.214132	0.0550347	0.833156
23	M32504	MR Egger	Idiopathic pulmonary fibrosis || id:finn-b-IPF	docosapentaenoate (n3 DPA; 22:5n3)	10	-0.902023	1.9169	0.650514	-4.65914	2.85509	0.405748	0.00947463	17.376
24	M32504	Weighted median	Idiopathic pulmonary fibrosis || id:finn-b-IPF	docosapentaenoate (n3 DPA; 22:5n3)	10	-2.08013	0.978028	0.0334319	-3.99706	-0.163192	0.124914	0.0183695	0.849428
25	M32578	Inverse variance weighted	Idiopathic pulmonary fibrosis || id:finn-b-IPF	X-11261	16	0.84212	0.424656	0.0473603	0.00979428	1.67445	2.32128	1.00984	5.33584
26	M32578	MR Egger	Idiopathic pulmonary fibrosis || id:finn-b-IPF	X-11261	16	1.68181	1.03013	0.124831	-0.337249	3.70086	5.37525	0.713731	40.4821
27	M32578	Weighted median	Idiopathic pulmonary fibrosis || id:finn-b-IPF	X-11261	16	1.31514	0.570815	0.0212244	0.196343	2.43394	3.72527	1.21694	11.4037
28	M33140	Inverse variance weighted	Idiopathic pulmonary fibrosis || id:finn-b-IPF	X-11795	12	1.6352	0.762918	0.032085	0.139881	3.13052	5.13049	1.15014	22.8859
29	M33140	MR Egger	Idiopathic pulmonary fibrosis || id:finn-b-IPF	X-11795	12	2.93354	2.17424	0.207019	-1.32796	7.19504	18.794	0.265016	1332.81
30	M33140	Weighted median	Idiopathic pulmonary fibrosis || id:finn-b-IPF	X-11795	12	1.39445	1.03957	0.179798	-0.6431	3.43201	4.03277	0.525661	30.9387
31	M33610	Inverse variance weighted	Idiopathic pulmonary fibrosis || id:finn-b-IPF	X-12189	27	-0.218849	0.0933331	0.0190365	-0.401782	-0.035916	0.803443	0.669127	0.964721
32	M33610	MR Egger	Idiopathic pulmonary fibrosis || id:finn-b-IPF	X-12189	27	-0.115494	0.14021	0.417887	-0.390307	0.159318	0.890926	0.676849	1.17271
33	M33610	Weighted median	Idiopathic pulmonary fibrosis || id:finn-b-IPF	X-12189	27	-0.222845	0.130504	0.0877153	-0.478631	0.0329424	0.800239	0.619631	1.03349
34	M33864	Inverse variance weighted	Idiopathic pulmonary fibrosis || id:finn-b-IPF	X-12428	9	-0.687117	0.336793	0.0413324	-1.34723	-0.027004	0.503024	0.259959	0.973357
35	M33864	MR Egger	Idiopathic pulmonary fibrosis || id:finn-b-IPF	X-12428	9	-0.546354	0.64931	0.427909	-1.819	0.726294	0.579057	0.162187	2.0674
36	M33864	Weighted median	Idiopathic pulmonary fibrosis || id:finn-b-IPF	X-12428	9	-0.712824	0.494506	0.149447	-1.68206	0.256408	0.490258	0.185991	1.29228
37	M33885	Inverse variance weighted	Idiopathic pulmonary fibrosis || id:finn-b-IPF	X-12443	12	0.591365	0.276239	0.0322925	0.0499363	1.13279	1.80645	1.0512	3.10432
38	M33885	MR Egger	Idiopathic pulmonary fibrosis || id:finn-b-IPF	X-12443	12	0.537882	0.594781	0.387084	-0.627888	1.70365	1.71238	0.533718	5.49398
39	M33885	Weighted median	Idiopathic pulmonary fibrosis || id:finn-b-IPF	X-12443	12	0.376763	0.392193	0.336725	-0.391936	1.14546	1.45756	0.675747	3.14389
40	M33936	Inverse variance weighted	Idiopathic pulmonary fibrosis || id:finn-b-IPF	octanoylcarnitine	15	1.22347	0.539984	0.0234666	0.165101	2.28184	3.39896	1.17951	9.79467
41	M33936	MR Egger	Idiopathic pulmonary fibrosis || id:finn-b-IPF	octanoylcarnitine	15	1.1156	0.974979	0.273158	-0.795355	3.02656	3.05141	0.451421	20.6262
42	M33936	Weighted median	Idiopathic pulmonary fibrosis || id:finn-b-IPF	octanoylcarnitine	15	0.723181	0.653154	0.268202	-0.557002	2.00336	2.06098	0.572924	7.41395
43	M33937	Inverse variance weighted	Idiopathic pulmonary fibrosis || id:finn-b-IPF	alpha-hydroxyisovalerate	15	-1.12685	0.538635	0.0364348	-2.18257	-0.071122	0.324053	0.112751	0.931348
44	M33937	MR Egger	Idiopathic pulmonary fibrosis || id:finn-b-IPF	alpha-hydroxyisovalerate	15	0.731959	1.53434	0.641244	-2.27534	3.73926	2.07915	0.102762	42.0667
45	M33937	Weighted median	Idiopathic pulmonary fibrosis || id:finn-b-IPF	alpha-hydroxyisovalerate	15	-0.41893	0.772884	0.587794	-1.93378	1.09592	0.65775	0.1446	2.99194
46	M34400	Inverse variance weighted	Idiopathic pulmonary fibrosis || id:finn-b-IPF	1,7-dimethylurate	11	-0.913171	0.429468	0.0334797	-1.75493	-0.0714133	0.40125	0.172919	0.931077
47	M34400	MR Egger	Idiopathic pulmonary fibrosis || id:finn-b-IPF	1,7-dimethylurate	11	-1.43752	0.79118	0.102601	-2.98824	0.113192	0.237516	0.0503763	1.11985
48	M34400	Weighted median	Idiopathic pulmonary fibrosis || id:finn-b-IPF	1,7-dimethylurate	11	-1.03013	0.589771	0.0806966	-2.18608	0.125823	0.356961	0.112356	1.13408
49	M34419	Inverse variance weighted	Idiopathic pulmonary fibrosis || id:finn-b-IPF	1-linoleoylglycerophosphocholine	15	1.88091	0.92949	0.0430115	0.0591142	3.70271	6.5595	1.0609	40.5572
50	M34419	MR Egger	Idiopathic pulmonary fibrosis || id:finn-b-IPF	1-linoleoylglycerophosphocholine	15	4.07233	2.58769	0.139563	-0.999539	9.14419	58.6934	0.368049	9359.93
51	M34419	Weighted median	Idiopathic pulmonary fibrosis || id:finn-b-IPF	1-linoleoylglycerophosphocholine	15	0.932957	1.31942	0.479507	-1.65311	3.51902	2.54201	0.191454	33.7514
52	M34469	Inverse variance weighted	Idiopathic pulmonary fibrosis || id:finn-b-IPF	X-12786	11	1.21548	0.524325	0.0204398	0.1878	2.24315	3.3719	1.20659	9.42301
53	M34469	MR Egger	Idiopathic pulmonary fibrosis || id:finn-b-IPF	X-12786	11	0.980453	0.942497	0.325352	-0.866842	2.82775	2.66566	0.420277	16.9073
54	M34469	Weighted median	Idiopathic pulmonary fibrosis || id:finn-b-IPF	X-12786	11	1.01785	0.712924	0.153376	-0.379483	2.41518	2.76723	0.684215	11.1918
55	M35464	Inverse variance weighted	Idiopathic pulmonary fibrosis || id:finn-b-IPF	X-13671	15	3.14255	1.02752	0.00222525	1.12862	5.15648	23.1629	3.09139	173.553
56	M35464	MR Egger	Idiopathic pulmonary fibrosis || id:finn-b-IPF	X-13671	15	0.398126	4.10195	0.924161	-7.6417	8.43795	1.48903	0.00048001	4619.1
57	M35464	Weighted median	Idiopathic pulmonary fibrosis || id:finn-b-IPF	X-13671	15	2.04127	1.46413	0.163261	-0.828421	4.91097	7.7004	0.436738	135.77
58	M36300	Inverse variance weighted	Idiopathic pulmonary fibrosis || id:finn-b-IPF	X-14374	8	-2.27751	1.12864	0.0435999	-4.48966	-0.0653682	0.102539	0.0112245	0.936723
59	M36300	MR Egger	Idiopathic pulmonary fibrosis || id:finn-b-IPF	X-14374	8	-1.09921	5.18271	0.839057	-11.2573	9.0589	0.333134	1.29e-05	8594.67
60	M36300	Weighted median	Idiopathic pulmonary fibrosis || id:finn-b-IPF	X-14374	8	-1.87839	1.37505	0.171922	-4.57348	0.816701	0.152836	0.010322	2.26302
61	M36673	Inverse variance weighted	Idiopathic pulmonary fibrosis || id:finn-b-IPF	X-14745	12	1.59882	0.80351	0.046613	0.0239444	3.1737	4.94721	1.02423	23.8958
62	M36673	MR Egger	Idiopathic pulmonary fibrosis || id:finn-b-IPF	X-14745	12	4.18947	4.93582	0.415855	-5.48474	13.8637	65.9877	0.00414962	1.04934e+06
63	M36673	Weighted median	Idiopathic pulmonary fibrosis || id:finn-b-IPF	X-14745	12	1.2487	1.12311	0.266212	-0.952588	3.44999	3.48581	0.385741	31.5
